# Supplementary material for: National medicines regulatory authorities financial sustainability in the East African Community
Source: PLOS journal article supplement (doi:10.1371/journal.pone.0236332), 2020-07-23
Supplement: S1 (10.1371/journal.pone.0236332.s001) [file journal.pone.0236332.s001]

## S1: QUESTIONNAIRE AND CHECKLIST FOR HEADS OF NMRAs & M&E EXPERTS

This detailed survey for NMRA provides an overview of the regulatory system in a country including existing capacities and limitations and participation in the East African Community medicines regulatory harmonization scheme. Please fill in the required information and place a tick or a cross in your answer to the questions below:

| CATEGORY                                                                                                                  | YES | NO | N/A |
|---------------------------------------------------------------------------------------------------------------------------|-----|----|-----|
| <b>POLICY AND LEGAL FRAMEWORK</b>                                                                                         |     |    |     |
| <b>Policy Framework</b>                                                                                                   |     |    |     |
| Is access to quality, safe and efficacious medicines one of the priority components of a national health delivery system? |     |    |     |
| Is there a national medicines policy (NMP) in the country? (Yes or No)                                                    |     |    |     |
| If Yes; when was the NMP approved by the Government? (Indicate year of approval)                                          |     |    |     |
| Does the NMP provide for establishment of an autonomous national medicines regulatory agency (NMRA)? (Yes or No)          |     |    |     |
| <b>Legal Framework</b>                                                                                                    |     |    |     |
| Is there a Law for regulating medicine in your country? (Yes or No)                                                       |     |    |     |
| What is the name of the law regulating medicines in the country?<br>Mention.....<br>.....                                 |     |    |     |
| When was the medicines law enacted?<br>Indicate year: .....                                                               |     |    |     |
| Indicate if the following provisions and functions are covered in the legislation                                         |     |    |     |

|                                                                                                     |  |  |  |
|-----------------------------------------------------------------------------------------------------|--|--|--|
| Market Authorization                                                                                |  |  |  |
| Licensing Manufacturers, Importers, Exporters, Wholesalers and Distributors                         |  |  |  |
| Post Market surveillance and safety monitoring                                                      |  |  |  |
| Regulatory Inspection and Enforcement                                                               |  |  |  |
| Control of Clinical Trials of Medical Products                                                      |  |  |  |
| Control of Promotion and Advertisement of Medical Products                                          |  |  |  |
| Establishment of Quality Control Laboratory                                                         |  |  |  |
| Scheduling, Classification and Control of medical products                                          |  |  |  |
| Prohibition of Substandard/Spurious/Falsified/Falsely-labelled/Counterfeit (SSFFC) medical products |  |  |  |
| Control of narcotics and psychotropic substances                                                    |  |  |  |
| Scope of regulated products                                                                         |  |  |  |
| Offences and legal proceedings                                                                      |  |  |  |
| Administrative appeal procedures                                                                    |  |  |  |
| International Cooperation and Harmonization of Regulation of Medical Products                       |  |  |  |
| Monitoring and Evaluation of National Regulatory Systems                                            |  |  |  |
| Transparency and information sharing                                                                |  |  |  |
| Monitoring and evaluation of regulatory systems                                                     |  |  |  |
| Power to make regulations                                                                           |  |  |  |
| Number and type of Regulations made under the Act                                                   |  |  |  |

|                                                                                                                                                             |         |          |          |
|-------------------------------------------------------------------------------------------------------------------------------------------------------------|---------|----------|----------|
| Specified Guidelines to be made under the Act                                                                                                               |         |          |          |
| Declaration and Conflict of interests                                                                                                                       |         |          |          |
| Restriction of liability                                                                                                                                    |         |          |          |
| Protection of and access to information                                                                                                                     |         |          |          |
| Regulation of other related products                                                                                                                        |         |          |          |
| Commencement and entry into force                                                                                                                           |         |          |          |
|                                                                                                                                                             |         |          |          |
| <b>GOVERNANCE, MANAGEMENT AND FINANCING</b>                                                                                                                 |         |          |          |
| NMRA Governance                                                                                                                                             |         |          |          |
| Is the NMRA autonomous? Yes or No                                                                                                                           |         |          |          |
| Is there a Governing Board for NMRA? Yes or No                                                                                                              |         |          |          |
| If Yes, indicate if the Board is Strategic, Executive or Advisory in its nature of functions                                                                |         |          |          |
| Are there Technical/Expert Committee(s) responsible for assessing applications for registration of pharmaceutical products and GMP inspection? (Yes or No). |         |          |          |
| Who makes the final registration decision? (Tick as appropriate)                                                                                            | Yes     | No       |          |
| Board                                                                                                                                                       |         |          |          |
| Technical/Expert Committee                                                                                                                                  |         |          |          |
| Other (specify)                                                                                                                                             |         |          |          |
| Indicate frequency of Technical Committee and Board meetings per annum (p.a.)                                                                               | <2 p.a. | 2-4 p.a. | > 4 p.a. |

|                                                                                                       |  |  |  |
|-------------------------------------------------------------------------------------------------------|--|--|--|
| Board                                                                                                 |  |  |  |
| Technical/Expert Committee on Registration of medicines                                               |  |  |  |
| Technical/Expert Committee on GMP Inspection                                                          |  |  |  |
| NMRA Management                                                                                       |  |  |  |
| Quality Management System (QMS) in EAC                                                                |  |  |  |
| Has the NMRA instituted the EAC QMS (Yes or No)                                                       |  |  |  |
| If Yes, is the NMRA registration processes ISO Certified (Yes or No)                                  |  |  |  |
| <b>Management Information System (MIS) in EAC</b>                                                     |  |  |  |
| Has the NMRAs instituted the EAC-MIS (Yes or No)                                                      |  |  |  |
| Is the NMRA sharing regulatory information with others in the EAC region (Yes or No)                  |  |  |  |
| Is the NMRA MIS linked to other NMRAs in the EAC region (Yes or No)                                   |  |  |  |
| Is the NMRA MIS linked to EAC Secretariat (Yes or No)                                                 |  |  |  |
| Has the NMRA instituted e-CTD for registration of medicines (Yes or No)                               |  |  |  |
| <b>NMRA FINANCING</b>                                                                                 |  |  |  |
| What is the total annual budget (in US\$) for the NMRA and financing gap for the past five (5) years? |  |  |  |
| 2011                                                                                                  |  |  |  |
| 2012                                                                                                  |  |  |  |
| 2013                                                                                                  |  |  |  |
| 2014                                                                                                  |  |  |  |
| 2015                                                                                                  |  |  |  |

|                                                                                                                                          |  |  |  |
|------------------------------------------------------------------------------------------------------------------------------------------|--|--|--|
| What are the sources of funding for the NMRA in US\$? If possible, please indicate the approximate % by source for the last 4 years.     |  |  |  |
| Government                                                                                                                               |  |  |  |
| Industry Fees                                                                                                                            |  |  |  |
| Donors                                                                                                                                   |  |  |  |
| Other (please specify)                                                                                                                   |  |  |  |
| Is the regulatory authority allowed to retain service fees collected from industry for execution of regulatory functions? Yes/No/Partly. |  |  |  |
| If Yes or Partly; provide explanation how is the money used:<br>.....<br>.....                                                           |  |  |  |
| Is the NMRA Audited annually (Yes or No)                                                                                                 |  |  |  |
| If Yes, indicate audit outcome for the past five (5) years (e.g. unqualified, qualified or adverse opinion)                              |  |  |  |
| 2011                                                                                                                                     |  |  |  |
| 2012                                                                                                                                     |  |  |  |
| 2013                                                                                                                                     |  |  |  |
| 2014                                                                                                                                     |  |  |  |
| 2015                                                                                                                                     |  |  |  |
